# Supplementary material for: Association Between Risk of COVID-19 Infection in Nonimmune Individuals and COVID-19 Immunity in Their Family Members
Source: PubMed Central journal article supplement (PMC8506298; doi:10.1001/jamainternmed.2021.5814), 2021-10-11
Supplement: jamainternmed-e215814-s001.pdf [file jamainternmed-e215814-s001.pdf]

## Supplemental Online Content

**Nordström P, Ballin M, Nordström A. Association Between risk of COVID-19 infection in nonimmune individuals and COVID-19 immunity in their family members. *JAMA Intern Med.* Published online October 11, 2021. doi:10.1001/jamainternmed.2021.5814**

**eTable 1. Baseline Characteristics When Immunity Was Defined as Previous Infection**

**eTable 2. Risk of Covid-19 Infection in Families with Two-Five Members.**

**eTable 3. Baseline Characteristics When Immunity Was Defined as 1 Dose of Vaccine**

**eTable 4. Risk of Covid-19 Infection in Families with Two-Four Members.**

**This supplemental material has been provided by the authors to give readers additional information about their work.**

**eTable 1. Baseline Characteristics When Immunity Was Defined as Previous Infection.** Baseline characteristics for individuals with no immunity (N=1,430,339) in families with 2-5 family members. Data is presented based on number of immune individuals in each family at baseline. Immunity was defined as previous Covid-19 infection.

|                                        | All families<br>1,430,339 | Characteristics based on number of individuals with immunity in each family at baseline |                                       |                                       |                                      |                                    |
|----------------------------------------|---------------------------|-----------------------------------------------------------------------------------------|---------------------------------------|---------------------------------------|--------------------------------------|------------------------------------|
|                                        |                           | 0 immune family members<br>(N=1,262,464)                                                | 1 immune family member<br>(N=140,707) | 2 immune family members<br>(N=21,747) | 3 immune family members<br>(N=4,721) | 4 immune family members<br>(N=700) |
| <b>Age, mean, SD</b>                   | 50.8±17.6                 | 51.9±17.3                                                                               | 44.8±17.1                             | 35.1±18.3                             | 31.0±17.0                            | 27.4±15.6                          |
| Range                                  | 1.4-104.2                 | 1.4-104.2                                                                               | 1.3-100.8                             | 1.4-85.6                              | 2.6-77.0                             | 2.2-74.0                           |
| <b>Female sex, N (%)</b>               | 713,037 (49.9%)           | 633,630 (50.2%)                                                                         | 66,827 (47.5%)                        | 10,098 (46.4%)                        | 2,149 (45.5%)                        | 333 (47.6%)                        |
| <b>Highest education, N (%)</b>        |                           |                                                                                         |                                       |                                       |                                      |                                    |
| Elementary school < 9yrs               | 55,704 (3.9%)             | 50,692 (4.0%)                                                                           | 4,338 (3.1%)                          | 543 (2.5%)                            | 113 (2.4%)                           | 18 (2.6%)                          |
| Elementary school 9yrs                 | 175,403 (12.3%)           | 153,390 (12.2%)                                                                         | 17,578 (12.5%)                        | 3,406 (15.7%)                         | 887 (18.8%)                          | 142 (20.3%)                        |
| Secondary school, 2 yrs                | 329,821 (23.1%)           | 299,897 (23.8%)                                                                         | 26,758 (19.0%)                        | 2,698 (12.4%)                         | 427 (9.0%)                           | 41 (5.9%)                          |
| Secondary school, >2 yrs               | 255,095 (17.8%)           | 222,313 (17.6%)                                                                         | 27,357 (19.4%)                        | 4,280 (19.7%)                         | 989 (20.9%)                          | 156 (22.3%)                        |
| University education                   | 504,084 (35.2%)           | 447,584 (35.5%)                                                                         | 49,674 (35.3%)                        | 5,677 (26.1%)                         | 1,026 (21.7%)                        | 123 (17.6%)                        |
| Unknown <sup>a</sup>                   | 110,232 (7.7%)            | 88,588 (7.0%)                                                                           | 15,002 (10.7%)                        | 5,143 (23.6%)                         | 1,279 (27.1%)                        | 220 (31.4%)                        |
| <b>Income (Euro), mean, SD</b>         | 23,607±85,786             | 29,365±70,985                                                                           | 30,313±148,764                        | 22,849±123,736                        | 17,340±22,807                        | 13,283±18,575                      |
| <b>Early retirement pension, N (%)</b> | 57,505 (4.0%)             | 52,720 (4.2%)                                                                           | 4,213 (3.0%)                          | 474 (2.2%)                            | 83 (1.8%)                            | 15 (2.1%)                          |
| <b>Born in Sweden, N (%)</b>           | 1,163,140 (81.3%)         | 1,032,526 (81.8%)                                                                       | 109,516 (77.8%)                       | 16,944 (77.9%)                        | 3,648 (77.3%)                        | 506 (72.3%)                        |
| <b>Diagnoses, N (%)</b>                |                           |                                                                                         |                                       |                                       |                                      |                                    |
| Myocardial infarction                  | 26,236 (1.8%)             | 24,483 (1.9%)                                                                           | 1,584 (1.1%)                          | 139 (0.6%)                            | 26 (0.6%)                            | 4 (0.6%)                           |
| Stroke                                 | 17,352 (1.2%)             | 16,252 (1.3%)                                                                           | 996 (0.7%)                            | 81 (0.4%)                             | 20 (0.4%)                            | 3 (0.4%)                           |
| Diabetes                               | 106,335 (7.4%)            | 97,132 (7.7%)                                                                           | 8,093 (5.8%)                          | 904 (4.2%)                            | 179 (3.8%)                           | 27 (3.9%)                          |
| Hypertension                           | 365,753 (25.6%)           | 338,741 (26.8%)                                                                         | 24,383 (17.3%)                        | 2,238 (10.3%)                         | 349 (7.4%)                           | 42 (6.0%)                          |
| Kidney failure                         | 10,468 (0.7%)             | 9,623 (0.8%)                                                                            | 738 (0.5%)                            | 84 (0.4%)                             | 22 (0.5%)                            | 1 (0.1%)                           |
| COPD <sup>#</sup>                      | 11,662 (0.8%)             | 10,990 (0.9%)                                                                           | 591 (0.4%)                            | 67 (0.3%)                             | 12 (0.3%)                            | 2 (0.3%)                           |
| Cancer                                 | 54,834 (3.8%)             | 51,186 (4.1%)                                                                           | 3,301 (2.3%)                          | 299 (1.4%)                            | 42 (0.9%)                            | 6 (0.9%)                           |

<sup>a</sup>Education and income were registered for individuals born earlier than October 2005. SD = standard deviation.

<sup>#</sup> Chronic obstructive pulmonary disease

**eTable 2. Risk of Covid-19 Infection in Families with Two-Five Members.** Cox regression was used to calculate hazard ratios (HR) with the number of immune members in each family as exposure, and the outcome of Covid-19 infection in non-immune family members. Analyses were performed separately for families with 2-5 members, using families with no immunity as reference. Immunity was defined as a previous infection.

| <b>Families with two relatives</b>                 |                              | Model 1 <sup>#</sup> |           | Model 2 <sup>*</sup> |           |
|----------------------------------------------------|------------------------------|----------------------|-----------|----------------------|-----------|
| Number of individuals with immunity in each family | Incident Covid-19 cases, (%) | HR                   | 95% CI    | HR                   | 95% CI    |
| None (N=1,004,018)                                 | 36,450 (3.5%)                | 1                    | (ref)     | 1                    | (ref)     |
| One (N=83,530)                                     | 2,258 (2.7%)                 | 0.48                 | 0.46-0.50 | 0.47                 | 0.45-0.49 |
| <b>Families with three relatives</b>               |                              | Model 1 <sup>#</sup> |           | Model 2 <sup>*</sup> |           |
| Number of individuals with immunity in each family | Incident Covid-19 cases, (%) | HR                   | 95% CI    | HR                   | 95% CI    |
| None (N=181,437)                                   | 24,258 (13.4%)               | 1                    | (ref)     | 1                    | (ref)     |
| One (N=45,968)                                     | 2,558 (5.6%)                 | 0.44                 | 0.42-0.46 | 0.43                 | 0.41-0.45 |
| Two (N=15,962)                                     | 643 (4.0%)                   | 0.23                 | 0.21-0.25 | 0.22                 | 0.21-0.24 |
| <b>Families with four relatives</b>                |                              | Model 1 <sup>#</sup> |           | Model 2 <sup>*</sup> |           |
| Number of individuals with immunity in each family | Incident Covid-19 cases, (%) | HR                   | 95% CI    | HR                   | 95% CI    |
| None (N=33,944)                                    | 14,490 (42.7%)               | 1                    | (ref)     | 1                    | (ref)     |
| One (N=10,161)                                     | 1,580 (15.5%)                | 0.33                 | 0.31-0.35 | 0.33                 | 0.32-0.35 |
| Two (N=5,266)                                      | 365 (6.9%)                   | 0.13                 | 0.12-0.15 | 0.13                 | 0.12-0.15 |
| Three (N=4,131)                                    | 220 (5.3%)                   | 0.09                 | 0.08-0.10 | 0.09                 | 0.08-0.10 |
| <b>Families with five relatives</b>                |                              | Model 1 <sup>#</sup> |           | Model 2 <sup>*</sup> |           |
| Number of individuals with immunity in each family | Incident Covid-19 cases, (%) | HR                   | 95% CI    | HR                   | 95% CI    |
| None (N=5,065)                                     | 3,529 (69.7%)                | 1                    | (ref)     | 1                    | (ref)     |
| One (N=1,048)                                      | 416 (39.7%)                  | 0.45                 | 0.41-0.50 | 0.45                 | 0.41-0.50 |
| Two (N=519)                                        | 73 (14.1%)                   | 0.14                 | 0.11-0.17 | 0.14                 | 0.11-0.17 |
| Three (N=590)                                      | 39 (6.6%)                    | 0.06                 | 0.04-0.08 | 0.06                 | 0.04-0.08 |
| Four (N=700)                                       | 22 (3.1%)                    | 0.03                 | 0.02-0.04 | 0.03                 | 0.02-0.04 |

**eTable 3. Baseline Characteristics When Immunity Was Defined as 1 Dose of Vaccine.**

Baseline characteristics for individuals with no immunity (N=1,453,545) in families with 2-4 family members. Data is presented based on number of immune individuals in each family at baseline. Immunity was defined as a single dose of any vaccine.

|                                        | All families<br>(N=1,453,545) | Characteristics based on number of individuals with immunity in each family at baseline |                                       |                                      |                                    |
|----------------------------------------|-------------------------------|-----------------------------------------------------------------------------------------|---------------------------------------|--------------------------------------|------------------------------------|
|                                        |                               | 0 immune family members<br>(N=1,291,760)                                                | 1 immune family member<br>(N=157,148) | 2 immune family members<br>(N=4,493) | 3 immune family members<br>(N=144) |
| <b>Age, mean, SD</b>                   | 52.2±17.4                     | 51.7±17.3                                                                               | 56.0±17.9                             | 39.4±16.3                            | 23.4±12.8                          |
| Range                                  | 1.4-104.2                     | 1.4-104.2                                                                               | 1.3-99.0                              | 3.0-86.7                             | 9.9-68.3                           |
| <b>Female sex, N (%)</b>               | 732,782 (50.4%)               | 649,534 (50.3%)                                                                         | 81,585 (51.9%)                        | 1,602 (35.7%)                        | 61 (42.4%)                         |
| <b>Highest education, N (%)</b>        |                               |                                                                                         |                                       |                                      |                                    |
| Elementary school < 9yrs               | 59,340 (4.1%)                 | 51,667 (4.0%)                                                                           | 7597 (4.8%)                           | 72 (1.6%)                            | 4 (2.8%)                           |
| Elementary school 9yrs                 | 177,413 (12.2%)               | 156,534 (12.1%)                                                                         | 20171 (12.8%)                         | 682 (15.2%)                          | 26 (18.1%)                         |
| Secondary school, 2 yrs                | 348,428 (24.0%)               | 304,717 (23.6%)                                                                         | 42862 (27.3%)                         | 837 (18.6%)                          | 12 (8.3%)                          |
| Secondary school, >2 yrs               | 254,367 (17.5%)               | 227,904 (17.6%)                                                                         | 25322 (16.1%)                         | 1,105 (24.6%)                        | 36 (25.0%)                         |
| University education                   | 513,961 (35.4%)               | 460,247 (35.6%)                                                                         | 52458 (33.4%)                         | 1,224 (27.2%)                        | 32 (22.2%)                         |
| Unknown <sup>a</sup>                   | 100,036 (6.9%)                | 90,691 (7.0%)                                                                           | 8738 (5.6%)                           | 573 (12.8%)                          | 34 (23.6%)                         |
| <b>Income (Euro), mean, SD</b>         | 29,257±80,790                 | 29,616±84,138                                                                           | 26,624±46,454                         | 18,426±19,776                        | 15,065±17,589                      |
| <b>Early retirement pension, N (%)</b> | 60,378 (4.2%)                 | 53,220 (4.1%)                                                                           | 6,778 (4.3%)                          | 374 (8.3%)                           | 6 (4.2%)                           |
| <b>Born in Sweden, N (%)</b>           | 1,193,374 (82.1%)             | 1,054,641 (81.6%)                                                                       | 134,663 (85.7%)                       | 3,950 (87.9%)                        | 120 (83.3%)                        |
| <b>Diagnoses, N (%)</b>                |                               |                                                                                         |                                       |                                      |                                    |
| Myocardial infarction                  | 28,390 (2.0%)                 | 24,747 (1.9%)                                                                           | 3,609 (2.3%)                          | 32 (0.7%)                            | 2 (1.4%)                           |
| Stroke                                 | 19,179 (1.3%)                 | 16,408 (1.3%)                                                                           | 2,739 (1.7%)                          | 30 (0.7%)                            | 2 (1.4%)                           |
| Diabetes                               | 112,797 (7.8%)                | 98,521 (7.6%)                                                                           | 14,001 (8.9%)                         | 264 (5.9%)                           | 11 (7.6%)                          |
| Hypertension                           | 396,572 (27.3%)               | 343,103 (26.6%)                                                                         | 52,814 (33.6%)                        | 635 (14.1%)                          | 20 (13.9%)                         |
| Kidney failure                         | 11,332 (0.8%)                 | 9,700 (0.8%)                                                                            | 1,592 (1.0%)                          | 38 (0.8%)                            | 2 (1.4%)                           |
| COPD <sup>#</sup>                      | 13,184 (0.9%)                 | 11,064 (0.9%)                                                                           | 2,103 (1.3%)                          | 16 (0.4%)                            | 1 (0.7%)                           |
| Cancer                                 | 60,895 (4.2%)                 | 51,803(4.0%)                                                                            | 8,992 (5.7%)                          | 97 (2.2%)                            | 3 (2.1%)                           |

<sup>a</sup>Education and income was registered for individuals born earlier than October 2005. SD = standard deviation.

<sup>#</sup> Chronic obstructive pulmonary disease

**eTable 4. Risk of Covid-19 Infection in Families with Two-Four Members.** Cox regression was used to calculate hazard ratios (HR) with the number of immune members in each family as exposure, and the outcome of Covid-19 infection in non-immune family members. Analyses were performed separately for families with 2-4 members, using families with no immunity as reference. Immunity was defined as single dose of vaccine, and individuals with two doses of vaccine or a previous infection were excluded.

| <b>Families with two relatives</b>                 |                              |      |           |
|----------------------------------------------------|------------------------------|------|-----------|
| Number of individuals with immunity in each family | Incident Covid-19 cases, (%) | HR   | 95% CI    |
| None (N=1,069,442)                                 | 41,058 (3.8%)                | 1    | (ref)     |
| One (N=129,151)                                    | 2,464 (1.6%)                 | 0.53 | 0.51-0.55 |
| <b>Families with three relatives</b>               |                              |      |           |
| Number of individuals with immunity in each family | Incident Covid-19 cases, (%) | HR   | 95% CI    |
| None (N=187,878)                                   | 26,034 (13.9%)               | 1    | (ref)     |
| One (N=23,794)                                     | 1,714 (7.2%)                 | 0.51 | 0.48-0.53 |
| Two (N=3,883)                                      | 181 (4.7%)                   | 0.34 | 0.29-0.39 |
| <b>Families with four relatives</b>                |                              |      |           |
| Number of individuals with immunity in each family | Incident Covid-19 cases, (%) | HR   | 95% CI    |
| None (N=34,440)                                    | 14,949 (43.4%)               | 1    | (ref)     |
| One (N=4,203)                                      | 791 (18.8%)                  | 0.37 | 0.35-0.40 |
| Two (N=610)                                        | 59 (9.7%)                    | 0.18 | 0.14-0.24 |
| Three (N=144)                                      | 10 (6.9%)                    | 0.12 | 0.07-0.23 |
